# Supplementary material for: Predictors of Pharmacy-Based Measurement and Self-Report of Antidepressant Adherence: Are Individuals Overestimating Adherence?
Source: Atypon-hosted journal article supplement (doi:10.1176/appi.ps.201400568), 2016-02-14
Supplement: appi.ps.201400568.ds001.pdf [file appi.ps.201400568.ds001.pdf]

Online Appendix Table 1. *Dial-Up Sample Characteristics*

|                     | 6 month cohort                     |    |                        |    | 12 month cohort   |    |     |                                    |    |                        |    |                   |    |       |
|---------------------|------------------------------------|----|------------------------|----|-------------------|----|-----|------------------------------------|----|------------------------|----|-------------------|----|-------|
|                     | Both BMQ<br>and MPR<br>Total N=281 |    | MPR only<br>Total N=96 |    | Test<br>Statistic | df | p   | Both BMQ<br>and MPR<br>Total N=265 |    | MPR only<br>Total N=99 |    | Test<br>Statistic | df | p     |
| N                   | %                                  | N  | %                      | N  |                   |    |     | %                                  | N  | %                      | N  |                   |    |       |
| Gender              |                                    |    |                        |    | $X^2=.03$         | 1  | .86 |                                    |    |                        |    | $X^2=4.07$        | 1  | .04   |
| Female              | 58                                 | 21 | 19                     | 20 |                   |    |     | 60                                 | 23 | 13                     | 13 |                   |    |       |
| Male                | 223                                | 79 | 77                     | 80 |                   |    |     | 205                                | 77 | 86                     | 87 |                   |    |       |
| Race                |                                    |    |                        |    | $X^2=.55$         | 1  | .46 |                                    |    |                        |    | $X^2=2.42$        | 1  | .12   |
| Non-white           | 63                                 | 23 | 25                     | 26 |                   |    |     | 55                                 | 21 | 28                     | 29 |                   |    |       |
| White               | 216                                | 77 | 70                     | 74 |                   |    |     | 209                                | 79 | 70                     | 71 |                   |    |       |
| Ethnicity           |                                    |    |                        |    | $X^2=.99$         | 1  | .32 |                                    |    |                        |    | $X^2=0.04$        | 1  | .83   |
| Hispanic/Latino     | 16                                 | 6  | 3                      | 3  |                   |    |     | 12                                 | 5  | 5                      | 5  |                   |    |       |
| Non-Hispanic/Latino | 265                                | 94 | 93                     | 97 |                   |    |     | 253                                | 95 | 94                     | 95 |                   |    |       |
| Age                 |                                    |    |                        |    | $X^2=1.01$        | 2  | .60 |                                    |    |                        |    | $X^2=3.91$        | 2  | .14   |
| <40                 | 31                                 | 11 | 14                     | 15 |                   |    |     | 25                                 | 9  | 16                     | 16 |                   |    |       |
| 40-64               | 209                                | 74 | 67                     | 70 |                   |    |     | 203                                | 77 | 67                     | 68 |                   |    |       |
| 65+                 | 41                                 | 15 | 15                     | 16 |                   |    |     | 37                                 | 14 | 16                     | 16 |                   |    |       |
| Education           |                                    |    |                        |    | $X^2=4.69$        | 2  | .10 |                                    |    |                        |    | $X^2=17.08$       | 2  | <.001 |
| High School or Less | 69                                 | 25 | 34                     | 36 |                   |    |     | 60                                 | 23 | 39                     | 40 |                   |    |       |
| Some College        | 115                                | 42 | 37                     | 39 |                   |    |     | 105                                | 40 | 43                     | 44 |                   |    |       |
| College or more     | 93                                 | 34 | 24                     | 25 |                   |    |     | 96                                 | 37 | 16                     | 16 |                   |    |       |
| Income              |                                    |    |                        |    | $X^2=1.75$        | 3  | .63 |                                    |    |                        |    | $X^2=1.95$        | 3  | .58   |
| <15k                | 82                                 | 31 | 25                     | 28 |                   |    |     | 74                                 | 30 | 28                     | 30 |                   |    |       |
| 15k- <25k           | 63                                 | 24 | 20                     | 22 |                   |    |     | 56                                 | 22 | 21                     | 22 |                   |    |       |
| 25- <50k            | 79                                 | 29 | 33                     | 37 |                   |    |     | 74                                 | 30 | 33                     | 35 |                   |    |       |
| ≥50k                | 44                                 | 16 | 12                     | 13 |                   |    |     | 46                                 | 18 | 12                     | 13 |                   |    |       |
| Occupation          |                                    |    |                        |    | $X^2=2.26$        | 2  | .32 |                                    |    |                        |    | $X^2=.66$         | 2  | .72   |
| Retired             | 85                                 | 32 | 38                     | 40 |                   |    |     | 85                                 | 34 | 35                     | 36 |                   |    |       |
| Unemployed          | 130                                | 49 | 39                     | 41 |                   |    |     | 119                                | 48 | 48                     | 49 |                   |    |       |

|                                                |     |              |     |                  |           |    |     |     |              |     |                  |            |    |     |
|------------------------------------------------|-----|--------------|-----|------------------|-----------|----|-----|-----|--------------|-----|------------------|------------|----|-----|
| Employed                                       | 49  | 19           | 17  | 18               |           |    |     | 45  | 18           | 14  | 14               |            |    |     |
| Living Arrangement                             |     |              |     |                  | $X^2=.99$ | 1  | .32 |     |              |     |                  | $X^2=.07$  | 1  | .79 |
| Married/cohabiting                             | 153 | 55           | 47  | 49               |           |    |     | 145 | 55           | 53  | 54               |            |    |     |
| Non-cohabiting                                 | 126 | 45           | 49  | 51               |           |    |     | 118 | 45           | 46  | 46               |            |    |     |
| Baseline BDI severity                          |     |              |     |                  | $X^2=.95$ | 3  | .81 |     |              |     |                  | $X^2=2.10$ | 3  | .55 |
| Minimal                                        | 40  | 14           | 13  | 14               |           |    |     | 39  | 15           | 13  | 13               |            |    |     |
| Mild                                           | 40  | 14           | 14  | 15               |           |    |     | 41  | 15           | 11  | 11               |            |    |     |
| Moderate                                       | 89  | 32           | 26  | 27               |           |    |     | 79  | 30           | 28  | 28               |            |    |     |
| Severe                                         | 112 | 40           | 43  | 45               |           |    |     | 106 | 40           | 47  | 47               |            |    |     |
| Interpersonal Support (ISEL) (M, SD)           | 277 | 64.12, 21.73 | 87  | 64.26, 21.66     | $z=0.20$  |    | .84 | 257 | 64.07, 22.44 | 96  | 64.09, 19.81     | $z=0.20$   |    | .84 |
| Depression Coping Self-Efficacy (DCES) (M, SD) | 273 | 55.17, 15.98 | 89  | 54.71, 17.59     | $z=0.50$  |    | .62 | 255 | 54.93, 15.69 | 96  | 54.57, 17.33     | $z=.28$    |    | .78 |
| Side Effects                                   |     |              |     |                  | N/A       | -- | --  |     |              |     |                  | N/A        | -- | --  |
| Bothered by antidepressant side effects        | 23  | 8            | N/A | N/A <sup>2</sup> |           |    |     | 22  | 8            | N/A | N/A <sup>2</sup> |            |    |     |
| Not bothered by side effects                   | 258 | 92           | N/A | N/A <sup>2</sup> |           |    |     | 243 | 92           | N/A | N/A <sup>2</sup> |            |    |     |
| Medication Regimen                             |     |              |     |                  | $X^2=.02$ | 1  | .90 |     |              |     |                  | $X^2=5.04$ | 1  | .02 |
| Complex Medication Regimen <sup>1</sup>        | 128 | 46           | 43  | 45               |           |    |     | 134 | 51           | 37  | 37               |            |    |     |
| Non-Complex Regimen                            | 153 | 54           | 53  | 55               |           |    |     | 131 | 49           | 62  | 63               |            |    |     |

*Note.* As our different research questions required different compilations of participants based on which adherence assessments they had, sample characteristics are organized by participants with both an MPR and BMQ in the first column, and participants with only an MPR in the second column. Only 10 participants at 6 months and 12 participants at 12 months had only a BMQ assessment and thus this group is not included in the table due to its small size. Additionally,  $X^2$  or Wilcoxon  $p$ -levels are given to show whether there are significant differences between groups. <sup>1</sup>Complex medication regimen is taking drugs from 2 or more psychotropic classes in the past week. <sup>2</sup>This measure was determined by the BMQ.
